# Supplementary material
Source: HighWire-hosted journal article supplement (http://www.annfammed.org/highwire/filestream/8435/field_highwire_adjunct_files/0/Rat_Supp_App.pdf)
Supplement: Rat_Supp_App.pdf [file Rat_Supp_App.pdf]

## Supplemental material for

[Rat C, Quereux G, Riviere C, Clouet S, Senand R, Volteau C, Dreno B, Nguyen J. Targeted Melanoma Prevention Intervention: A Cluster Randomized Controlled Trial. Ann Fam Med. 2014;12:21-28.](#)

## **Supplemental Appendix. Telephone Questionnaire Assessing Patient Memory of the Campaign, Patient Knowledge of the Risk of Melanoma, and Patient Primary and Secondary Preventive Behaviors**

*When you consulted your general practitioner, Dr . . . . ., on . . . . ., 2011, there was a screening campaign on melanoma.*

### **Memory of the screening campaign**

1. Do you remember having seen the display corresponding to this prevention campaign?
2. Did you consult the leaflets on melanoma at your disposal?

### **Knowledge of the risk for melanoma**

1. Do you think you are at risk for developing a melanoma?
2. I will list 6 factors. Do you consider them to be risk factors for melanoma?
  - Having more than 20 moles on the 2 arms
  - Having freckles
  - Belonging to phototype 1 or 2
  - Having been sunburned in childhood
  - Having lived for more than 1 year in a country with strong sunshine (Africa, Middle East, French Overseas Territories, southern United States, Australia)
  - Having a family history of melanoma

**Since your visit to the medical practice, have you worried about developing a melanoma?**

### **Perceived screening self-efficacy**

In your opinion, if your moles changed in appearance, would you be able to notice it?

### **Primary and secondary prevention behaviors**

1. Do you sunbathe?
2. The last time you undertook an outdoor activity (gardening, biking, walking,...) on a warm and sunny day, did you protect from the sun?
3. Do you use tanning beds?
4. This summer, did you get a sunburn?
5. In the last 12 months, did you perform a skin self-examination?
  - If yes, - Did you have assistance from another person or a mirror?
  - Did you take a photograph?
